# Supplementary material
Source: Research Square preprint supplement (doi:10.21203/rs.3.rs-9505615/v1)
Supplement: Supplementary file 1 [file 6167d476d5d91e73cc18925b.docx]

Supplementary Table S1. Interobserver agreement for radiographic measurements and subsidence assessment

| **Measurement** | **Statistic Type** | **Statistic Value** | **95% Confidence Interval**  **(CI)** | **Agreement** |
| --- | --- | --- | --- | --- |
| Immediate postoperative height | ICC (2,1) | 0.918 | 0.852–0.941 | Excellent |
| Height loss (ΔH) | ICC (2,1) | 0.843 | 0.761–0.895 | Good |
| Overall cervical alignment offset (ΔcSVA) | ICC (2,1) | 0.895 | 0.824–0.927 | Good |
| C2–C7 Cobb angle loss | ICC (2,1) | 0.812 | 0.718–0.864 | Good |
| Upper adjacent vertebral HU value | ICC (2,1) | 0.904 | 0.835–0.932 | Excellent |
| Lower adjacent vertebral HU value | ICC (2,1) | 0.876 | 0.792–0.915 | Good |
| Subsidence occurrence | Cohen’s kappa | 0.724 | 0.615–0.812 | Good |

Note: Interobserver agreement for continuous variables was assessed using the intraclass correlation coefficient based on a two-way random-effects model with absolute agreement [ICC(2,1)]. Agreement for the categorical variable, subsidence occurrence, was evaluated using Cohen’s kappa coefficient. ICC or kappa values closer to 1 indicate higher agreement.
